# Supplementary material for: Correlation Analysis Between PFNA Insertion Point and Neck-Shaft Angle in Intertrochanteric Fractures, and Selection of PFNA (240mm) Under Varying Radius of Femoral Curvature
Source: Research Square preprint supplement (doi:10.21203/rs.3.rs-6502992/v1), 2025-05-13
Supplement: Supplementary file 1 [file 70223471b3e2694d2192b7d9.docx]

**Table 2** Comparison between different genders:NSA，L5，L6

| Index | All(n=200) | Male(n = 100) | Female (n = 100) | t valuex | P valuex |
| --- | --- | --- | --- | --- | --- |
| NSAy(°) | 129.27±6.77 | 131.76±6.44 | 126.77±6.17 | 5.579 | <0.001 |
| L5y(mm) | 5.51±2.05 | 6.07±2.00 | 4.93±1.95 | 4.086 | <0.001 |
| L6(mm) | 4.11±1.95 | 4.31±1.85 | 3.92±2.03 | 1.452 | 0.148 |

xt and P are the results of gender comparisons

yFor the Lengths and the distance of NSA, L5, intersex difference was significant (P < 0.05)
