# Supplementary material for: Correlation Analysis Between PFNA Insertion Point and Neck-Shaft Angle in Intertrochanteric Fractures, and Selection of PFNA (240mm) Under Varying Radius of Femoral Curvature
Source: Research Square preprint supplement (doi:10.21203/rs.3.rs-6502992/v1), 2025-05-13
Supplement: Supplementary file 2 [file e84d76e5fd609cb9b2a7c547.docx]

**Table 1** Comparison between different genders:L1, L2, L3, L4

| Index | All(n=200) | Male(n = 100) | Female (n = 100) | t valuex | P valuex |
| --- | --- | --- | --- | --- | --- |
| L1y(mm) | 397.37±30.47 | 423.07±19.33 | 371.68±12.25 | 12.29 | <0.001 |
| L2(mm) | 8.85±2.50 | 9.28±2.66 | 8.43±2.29 | 1.33 | 0.189 |
| L3(mm) | 21.89±3.57 | 22.25±3.78 | 21.52±3.38 | 0.79 | 0.434 |
| L4(mm) | 16.39±3.34 | 16.32±3.11 | 16.45±3.60 | -0.15 | 0.885 |

xt and P are the results of gender comparisons

yFor the Lengths and the distance of L1 , intersex difference was significant (P < 0.05)
